# Supplementary material for: Competitive dynamics of E2 and SN2 reaction driven by collision energy and leaving group
Source: Royal Society of Chemistry journal article supplement (doi:10.1039/d3cp03832g), 2023-01-01
Supplement: d3cp03832g1.pdf [file d3cp03832g1.pdf]

**Competitive dynamics of E2 and S<sub>N</sub>2 reaction driven by leaving group and  
collision energy**

Siwei Zhao, Gang Fu, Wenqing Zhen, Hongyi Wang, Meiling Liu, Li Yang,\* and  
Jiaxu Zhang\*

State Key Laboratory of Urban Water Resource and Environment  
MIT Key Laboratory of Critical Materials Technology for New Energy  
Conversion and Storage, School of Chemistry and Chemical Engineering,  
Harbin Institute of Technology,  
Harbin 150001, P. R. China

Author E-mail Address: yangli2014@hit.edu.cn and zhjx@hit.edu.cn

Table S1 Selected bond distances ( $\text{\AA}$ ), geometric looseness ( $\%L_{E2}$ ), and geometrical asymmetry ( $\%AS_{E2}$ ) of anti-E2-TS structures for  $F^- + CH_3CH_2Y$  ( $Y = Cl, Br^{22}, I^{34}$ ) reactions as optimized by M06/aug-cc-pVDZ and M06/ECP/d methods.

| Substitution | $r^{TS}(F-H_\beta)$ | $r^{TS}(C_\alpha-Y)$ | $r^{Product}(F-H_\beta)$ | $r^{Reactant}(C_\alpha-Y)$ | $\%(F-H_\beta)$ | $\%(C_\alpha-Y)$ | $\%L$ | $\%AS$ |
|--------------|---------------------|----------------------|--------------------------|----------------------------|-----------------|------------------|-------|--------|
| $CH_3CH_2Cl$ | 1.231               | 2.042                | 0.918                    | 1.813                      | 34.0            | 12.6             | 46.7  | 21.4   |
| $CH_3CH_2Br$ | 1.271               | 2.225                | 0.918                    | 1.969                      | 38.4            | 13.0             | 51.4  | 35.4   |
| $CH_3CH_2I$  | 1.311               | 2.424                | 0.918                    | 2.161                      | 42.8            | 12.2             | 55.0  | 30.6   |
